# Supplementary material
Source: publisher figshare collection journal article supplement (https://acs.figshare.com/ndownloader/files/6922988)
Supplement: Supplementary file 1 [file 6922988]

## Supporting Information

### Pronounced cellular uptake of pirarubicin versus that of other anthracyclines: Comparison of HPMA copolymer conjugates of pirarubicin and doxorubicin

Hideaki Nakamura<sup>a,b</sup>, Eva Koziolová<sup>c</sup>, Petr Chytil<sup>f</sup>, Kenji Tsukigawa<sup>b</sup>, Jun Fang<sup>a,b</sup>, Mamoru Haratake<sup>b</sup>,  
Karel Ulbrich<sup>c</sup>, Tomáš Etrych<sup>c</sup>, Hiroshi Maeda<sup>a\*</sup>

<sup>a</sup>Research Institute for Drug Delivery Science, Sojo University, Ikeda 4-22-1, Nishi-ku, Kumamoto 860-0082, Japan

<sup>b</sup>Faculty of Pharmaceutical Sciences, Sojo University, Ikeda 4-22-1, Nishi-ku, Kumamoto 860-0082, Japan

<sup>c</sup>Institute of Macromolecular Chemistry, The Czech Academy of Sciences, Heyrovsky Sq. 2, 162 06 Prague 6, Czech Republic

#### Table of contents

|                                                                                                      |           |
|------------------------------------------------------------------------------------------------------|-----------|
| Figure S1. Absorption and fluorescence spectra                                                       | Page SI 2 |
| Figure S2. Nuclear localization of anthracyclines                                                    | Page SI 3 |
| Figure S3. Chemical structures of P-DOX and P-THP                                                    | Page SI 3 |
| Figure S4. Liberation of free drugs from polymer-drug conjugates                                     | Page SI 4 |
| Figure S5. Nuclear localization of P-THP and P-DOX                                                   | Page SI 4 |
| Figure S6. Penetration and cellular uptake of free THP and free DOX in cultured tumor cell spheroid. | Page SI 5 |
| Figure S7. Body weight change in SUIT2 tumor-bearing mice                                            | Page SI 5 |
| Table S1. Cytotoxicity of P-DOX and P-THP against various cell human lines.                          | Page SI 6 |
| Table S2. Initial tumor volume of SUIT2 tumor bearing mice                                           | Page SI 7 |

Supplemental figure 1

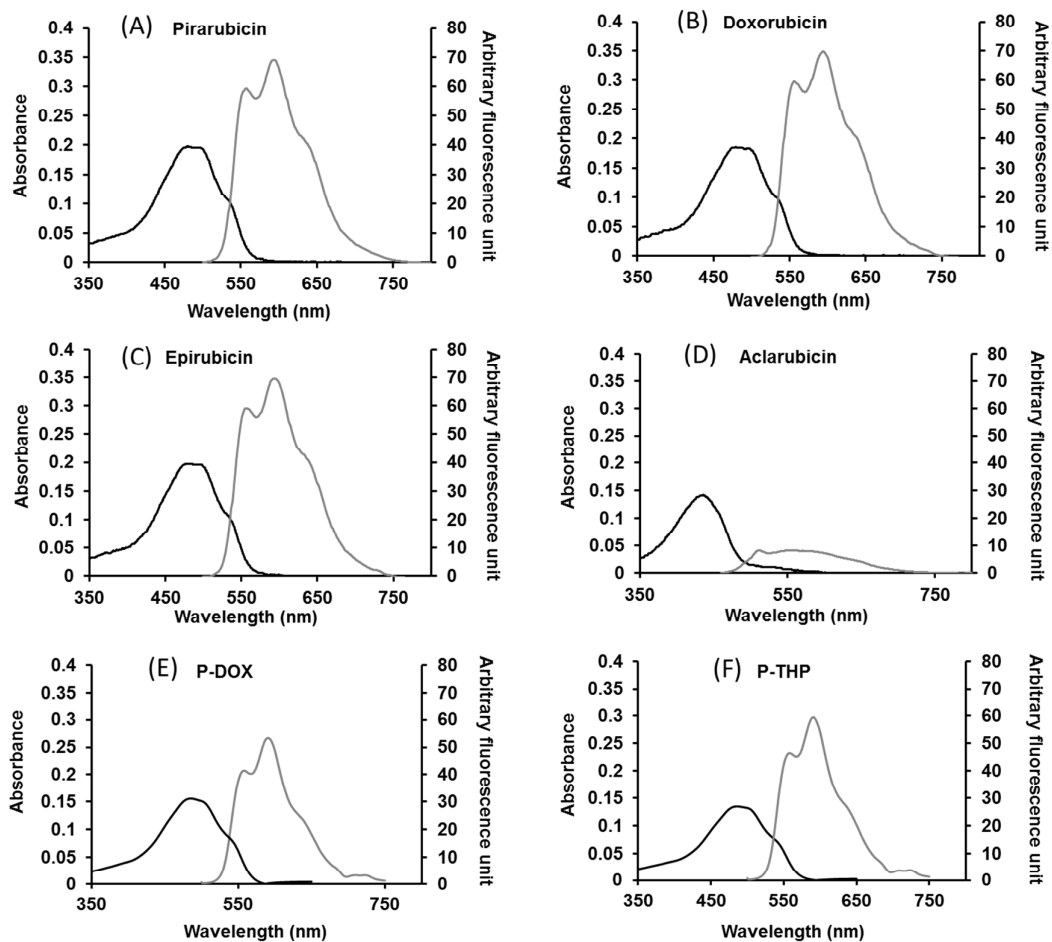

**Fig. S1.** Absorption and fluorescence spectra. Absorption spectra (black) and fluorescence spectra (gray), with excitation at 488 nm, of (A) THP, (B) DOX, (C) EPI, (D) aclarubicin, (E) P-DOX, and (F) P-THP in PBS.

### Supplemental figure 2

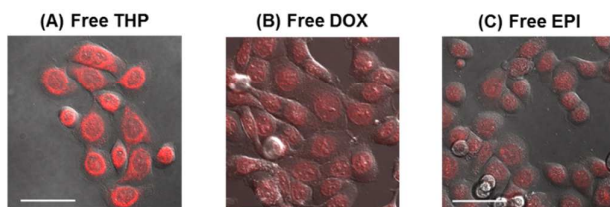

**Fig. S2.** Nuclear localization of anthracyclines. SUIT2 cells were treated with (A) free THP, (B) free DOX, and (C) free EPI, each at 5  $\mu\text{g}/\text{mL}$  after which cells were visualized by using confocal laser scanning microscopy under 5 %  $\text{CO}_2$  at 37  $^\circ\text{C}$ . The red indicates drug fluorescence. Display setting was each adjusted to see the nuclear localization of drugs clearly. Scale bars = 20  $\mu\text{m}$ .

### Supplemental figure 3

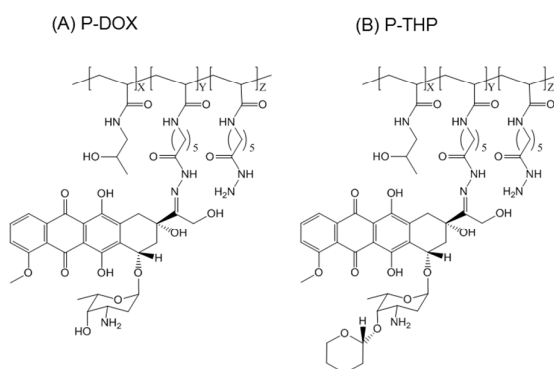

**Fig. S3.** Chemical structures of (A) P-DOX and (B) P-THP.

#### Supplemental figure 4

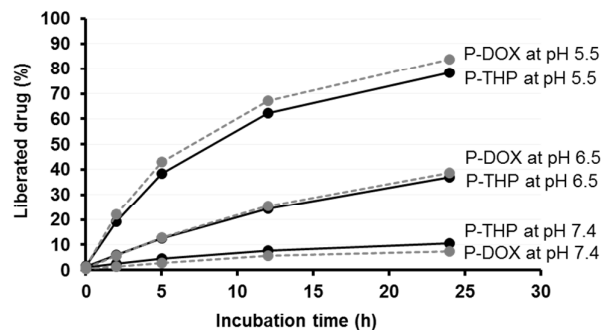

**Fig. S4.** Liberation of free drugs from polymer-drug conjugates. P-THP and P-DOX were incubated at pH 5.5, 6.5, and 7.4. Liberated free drug and polymer-bound drug were separated by using size exclusion chromatography and were detected by absorbance at 488 nm. The percentage of liberated drug was calculated by using the following equation: Liberated drug (%) =  $\text{AUC of liberated drug} / (\text{AUC of liberated drug} + \text{AUC of polymer-bound drug}) \times 100$ , where AUC = area under the curve.

#### Supplemental figure 5

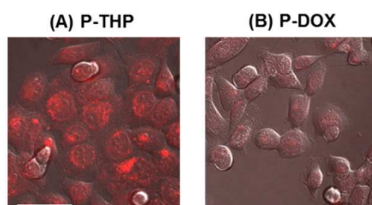

**Fig. S5.** Nuclear localization of P-THP and P-DOX. SUIT2 cells were treated with (A) P-THP, and (B) P-DOX, each at 5  $\mu\text{g}/\text{mL}$  after which cells were visualized by using confocal laser scanning microscopy under 5 %  $\text{CO}_2$  at 37  $^\circ\text{C}$ . The red indicates drug fluorescence. Display setting was each adjusted to see the nuclear localization of drugs clearly. Scale bars = 20  $\mu\text{m}$ .

### Supplemental figure 6

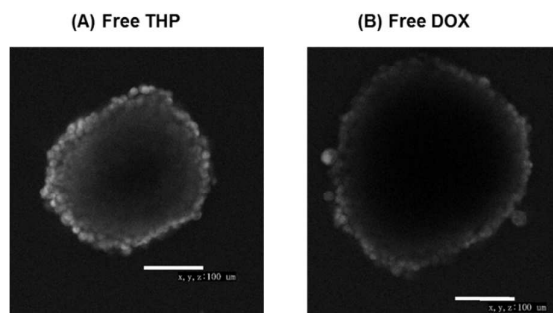

**Fig. S6.** Penetration and cellular uptake of free THP and free DOX in cultured tumor cell spheroid. HCT 116 cell spheroid having approx. 200  $\mu\text{m}$  in diameter was treated with 30  $\mu\text{g}/\text{mL}$  of THP or DOX, and drugs were visualized by confocal laser microscopy at 60 min. Images are taken at the center core of spheroids. Scale bars = 100  $\mu\text{m}$ . These images are representative image of triplicate experiments.

### Supplemental figure 7

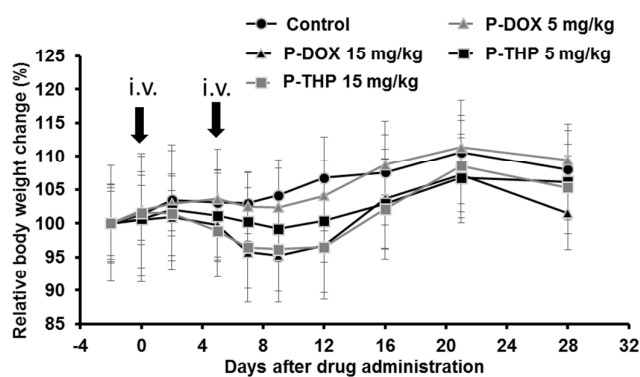

**Fig. S7.** Body weight change in SUIT2 tumor-bearing mice. Mice were given 5 or 15 mg/kg P-THP or P-DOX twice at the indicated times (arrows). Relative body weights were recorded. Values are means  $\pm$  SD;  $n = 6$ .

**Table S1**

Cytotoxicity of P-DOX and P-THP against various cell human lines.

| Cell line (origin)                                           | IC <sub>50</sub> (µg/mL) |       |
|--------------------------------------------------------------|--------------------------|-------|
|                                                              | P-THP                    | P-DOX |
| <b>SUIT2</b><br>(human pancreatic cancer)                    | 0.062                    | 0.44  |
| <b>MIAPaCa</b><br>(human pancreatic cancer)                  | 0.26                     | 1.82  |
| <b>HeLa</b><br>(human cervical cancer)                       | 0.24                     | 0.87  |
| <b>A549</b><br>(human non-small cell lung cancer)            | 0.092                    | 1.07  |
| <b>HepG2</b><br>(human hepatocellular carcinoma)             | 0.18                     | 1.65  |
| <b>SK-HEP</b><br>(human hepatic adenocarcinoma)              | 0.14                     | 0.94  |
| <b>DU145</b><br>(human prostate cancer)                      | 0.045                    | 0.30  |
| <b>HCT116</b><br>(human colon cancer)                        | 0.10                     | 0.56  |
| <b>HUVECs</b><br>(human umbilical vein endothelial cells)    | 0.048                    | 0.19  |
| <b>HEK293</b><br>(human embryonic kidney cells)              | 0.032                    | 0.074 |
| <b>16HBE</b><br>(human bronchial epithelial cells)           | 0.25                     | 0.72  |
| <b>KYSE150</b><br>(human esophageal squamous cell carcinoma) | 0.28                     | 1.25  |

**Table S2**

Initial tumor volume of SUIT2 tumor bearing mice

| <b>Treatment</b>                         | <b>Control</b> | <b>LP-DOX<br/>5 mg/kg</b> | <b>LP-DOX<br/>15 mg/kg</b> | <b>LP-THP<br/>5 mg/kg</b> | <b>LP-THP<br/>15 mg/kg</b> |
|------------------------------------------|----------------|---------------------------|----------------------------|---------------------------|----------------------------|
| <b>Tumor volume<br/>(mm<sup>3</sup>)</b> | 158 ± 61       | 142 ± 53                  | 199 ± 65                   | 158 ± 50                  | 188 ± 81                   |
